# Supplementary material for: Impact evaluation of different cash-based intervention modalities on child and maternal nutritional status in Sindh Province, Pakistan, at 6 mo and at 1 y: A cluster randomised controlled trial
Source: PLOS journal article supplement (doi:10.1371/journal.pmed.1002305), 2017-05-23
Supplement: S5 (10.1371/journal.pmed.1002305.s005) [file journal.pmed.1002305.s005]

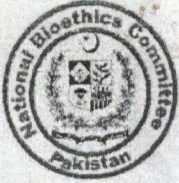

# National Bioethics Committee (NBC) Pakistan

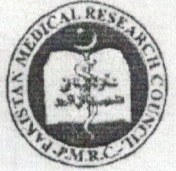

Ref: No.4-87/14/NBC-170/RDC/ 2304

Feb 12,  
Date: January 28, 2015

**Patron**  
Minister of State, Ministry of  
National Health Services Regulations  
and Coordination

**Chairperson**  
Secretary, Ministry of NHR&C,  
Government of Pakistan

**Vice Chairperson,**  
Director General, Ministry of  
NHR&C, Government of Pakistan

**Secretariat**  
Pakistan Medical Research Council

**Members Ex-Officio**

President, College of Physicians and  
Surgeons of Pakistan

President, Pakistan Medical and  
Dental Council, President

President, Pakistan Association of  
Family Physicians

Executive Director, Pakistan  
Medical Research Council,  
Member/Secretary

**WHO Country Representative**

President, Supreme Court Bar  
Association

DGMS (IS)/Surgeon General  
Pakistan Army

Director General Health, Punjab

Director General Health, Sindh

Director General Health, Khyber  
Pakhtun Khwa

Director Health Services, FATA

Director General Health,  
Balochistan

Director General Health, AJK

Director Health Services, Gilgit  
Baltistan

Registrar, Pakistan Nursing Council

**Members**

Prof. Dr. Aasim Ahmad (Chairman  
REC)

Prof. Dr. Farhat Moazam  
(Chairperson HCEC)

Prof. Dr. Munir Akhtar Saleemi

Prof. Dr. Zafar Hayat

Prof. Dr. Abdul Razzaq Sabir

Dr. Aamir Mustafa Jafarey

Dr. Asmatullah

Dr. Mahjabeen Khan

Dr. Farah Qadir

Dr. Farid Khan

**Ms Bridget Fenn**

Emergency Nutrition Network UK  
C/o Mr Shahid Fazal  
Head of department Nutrition,  
Health and Research (Co-investigator)  
H. No 4, Street 38, Sector F-8/1  
Islamabad.

**Subject: A cluster randomised controlled trial of the effectiveness  
and cost-effectiveness of cash transfer programmes on  
child nutrition status: study protocol for a randomised  
control trial (NBC-170)**

**Dear Ms Bridget Fenn,**

I am pleased to inform you that the above mentioned project has been  
cleared by "Research Ethics Committee of National Bioethics Committee".

Kindly keep the National Bioethics Committee Secretariat updated with the  
progress of the project and submit the formal final report on completion.

Yours sincerely

(Prof. Dr. Aasim Ahmad)

Chairman

NBC-Research Ethics Committee

NBC Secretariat:
