# Supplementary material for: Impact evaluation of different cash-based intervention modalities on child and maternal nutritional status in Sindh Province, Pakistan, at 6 mo and at 1 y: A cluster randomised controlled trial
Source: PLOS journal article supplement (doi:10.1371/journal.pmed.1002305), 2017-05-23
Supplement: S6 (10.1371/journal.pmed.1002305.s006) [file journal.pmed.1002305.s006]

## REFANI STUDY – QUESTIONNAIRES

### HOUSEHOLD QUESTIONNAIRE

(COMPLETE ONE QUESTIONNAIRE PER PARENT (father or mother) OF **[NAME(S)]** IN HH)

**NOTE:** CODE NAMES IN [ ] ARE STATA CODES – IN BOLD THEY ARE THE NAMES OF COMPOSITE VARIABLES

#### IDENTIFYING INFORMATION (for enumerators)

|                           |         |                 |        |
|---------------------------|---------|-----------------|--------|
| Round : [ ][ ]            | [MONTH] | Team number:    | [ ][ ] |
| UC NAME:<br>_____         |         | UC number:      | [ ][ ] |
| Village NAME:<br>_____    |         | Village Number: | [ ][ ] |
| Head of HH name:<br>_____ |         | HH number:      | [ ][ ] |

1. How many **years** has this family lived in this village? [ ] [HHYLIV]

2. How many people are there in this household? A household is described as all family members who ‘usually live and eat here’. Only include current members and not visitors or family members living elsewhere

[ ][ ] [HHSIZE]

3. How many children between the ages 6-48 months are there in this household? [ ][ ] [CNUM]

*This question is for enumerators to check that they collect data on the correct amount of children*

4. HH contact details (number and address):

Interviewed by:

Who is answering the questions? **CODE BOX #1**[ ][ ] [WHOANS]

Supervisor Name: \_\_\_\_\_ Supervisor Signature: \_\_\_\_\_

DATE \_\_\_\_\_/\_\_\_\_\_/\_\_\_\_\_ DD/MM/YYYY

## SECTION 1: HOUSEHOLD DEMOGRAPHY

RECORD INFORMATION FOR **EACH** FAMILY MEMBER. FIRST THE FATHER OF THE CHILD FOLLOWED BY PRIMARY CARER AND THEN THE SELECTED CHILD THEN THE OTHER FAMILY MEMBERS IN ORDER OF AGE - **ONLY INCLUDE PEOPLE WHO ARE CURRENT HH MEMBERS – NOT VISITORS OR FAMILY MEMBERS LIVING AWAY PERMANENTLY. ALSO** RECORD DETAILS FOR ANYONE WHO DIED IN THE HOUSEHOLD IN THE LAST 3 MONTHS – CHECK THIS WITH THE QUESTIONS ABOVE ON NUMBER OF FAMILY MEMBERS

QUESTIONS MARKED \* ARE BASELINE ONLY

| 1    | A*                                                          | B*                                                               | C*                       | D*                                                                                                                                                     | E*                                                                                                                                | F*                                                                                                                                                              | G                                                                            |                                            |
|------|-------------------------------------------------------------|------------------------------------------------------------------|--------------------------|--------------------------------------------------------------------------------------------------------------------------------------------------------|-----------------------------------------------------------------------------------------------------------------------------------|-----------------------------------------------------------------------------------------------------------------------------------------------------------------|------------------------------------------------------------------------------|--------------------------------------------|
|      | Family relation to [NAME]<br><br>CODE BOX #1<br><br>[HHPOS] | Age - <i>at last birthday</i> (years)<br><br>[HHAGE]<br>[MATAGE] | Sex (M/F)<br><br>[HHSEX] | Highest schooling level<br><i>00=None</i><br><i>01= Primary</i><br><i>02=Secondary</i><br><i>03= Informal</i><br><br>[HHSCH]<br>[MOTH_ED]<br>[FATH_ED] | Read &/or write in Sindhi?<br><br><i>00=No</i><br><i>01= Read only</i><br><i>02= Write only</i><br><i>03=Both</i><br><br>[SINDHI] | Do any of the people listed have a permanent health problem that stops performance of normal daily activities?<br><br><i>00=No</i><br><i>01= yes</i><br>[HHDIS] | Died (in past 3 months)<br><br><i>00= No</i><br><i>01= Yes</i><br><br>[DIED] | CODE BOX #1                                |
| 1.1  | [ ][ ]                                                      | [ ][ ]                                                           | [ ]                      | [ ][ ]                                                                                                                                                 | [ ][ ]                                                                                                                            | [ ][ ]                                                                                                                                                          | [ ][ ]                                                                       | 01 = Father                                |
| 1.2  | [ ][ ]                                                      | [ ][ ]                                                           | [ ]                      | [ ][ ]                                                                                                                                                 | [ ][ ]                                                                                                                            | [ ][ ]                                                                                                                                                          | [ ][ ]                                                                       | 02 = Mother                                |
| 1.3  | [ ][ ]                                                      | [ ][ ]                                                           | [ ]                      | [ ][ ]                                                                                                                                                 | [ ][ ]                                                                                                                            | [ ][ ]                                                                                                                                                          | [ ][ ]                                                                       | 03 = INDEX CHILD<br>6-48 months            |
| 1.4  | [ ][ ]                                                      | [ ][ ]                                                           | [ ]                      | [ ][ ]                                                                                                                                                 | [ ][ ]                                                                                                                            | [ ][ ]                                                                                                                                                          | [ ][ ]                                                                       | 04= Child < 6 months                       |
| 1.5  | [ ][ ]                                                      | [ ][ ]                                                           | [ ]                      | [ ][ ]                                                                                                                                                 | [ ][ ]                                                                                                                            | [ ][ ]                                                                                                                                                          | [ ][ ]                                                                       | 05 = Child > 5 years                       |
| 1.6  | [ ][ ]                                                      | [ ][ ]                                                           | [ ]                      | [ ][ ]                                                                                                                                                 | [ ][ ]                                                                                                                            | [ ][ ]                                                                                                                                                          | [ ][ ]                                                                       | 06 = Grandfather<br>(father's side)        |
| 1.7  | [ ][ ]                                                      | [ ][ ]                                                           | [ ]                      | [ ][ ]                                                                                                                                                 | [ ][ ]                                                                                                                            | [ ][ ]                                                                                                                                                          | [ ][ ]                                                                       | 07 = Grandmother<br>(father's side)        |
| 1.8  | [ ][ ]                                                      | [ ][ ]                                                           | [ ]                      | [ ][ ]                                                                                                                                                 | [ ][ ]                                                                                                                            | [ ][ ]                                                                                                                                                          | [ ][ ]                                                                       | 08 = Other relative<br>adults >18 years    |
| 1.9  | [ ][ ]                                                      | [ ][ ]                                                           | [ ]                      | [ ][ ]                                                                                                                                                 | [ ][ ]                                                                                                                            | [ ][ ]                                                                                                                                                          | [ ][ ]                                                                       | 09 = Other relative<br>children < 18 years |
| 1.10 | [ ][ ]                                                      | [ ][ ]                                                           | [ ]                      | [ ][ ]                                                                                                                                                 | [ ][ ]                                                                                                                            | [ ][ ]                                                                                                                                                          | [ ][ ]                                                                       | 10 = Non-relative                          |

|    |                                                                                                          |        |         |
|----|----------------------------------------------------------------------------------------------------------|--------|---------|
| 2* | Who is the full time carer of [NAME]? <b>CODE BOX #1</b>                                                 | [ ][ ] | [CAR]   |
| 3* | Religion of Head of Household<br><b>01= Muslim 02=Hindu 03=Christian 05=Other</b>                        | [ ][ ] | [HHREL] |
| 4* | Ethnicity of Head of Household<br><b>01= Sindhi 02=Muhajir 03= Punjabi 04= Pathan 05=Baloch 06=Other</b> | [ ][ ] | [HHETH] |

## **SECTION 2: FACILITIES AND INFRASTRUCTURE**

|    |                                                                              |                    |             |
|----|------------------------------------------------------------------------------|--------------------|-------------|
| 5* | How long does it take to get there? <b>MINUTES</b>                           | [ ] <b>minutes</b> | [HEALTHMIN] |
| 6* | How far away is it? Kilometers<br><b>01 = &lt;1km, 02 = 1-5km, 03 = 5+km</b> | [ ][ ] Km          | [HDIST]     |

|    |                                                                                                                                                                              |        |         |
|----|------------------------------------------------------------------------------------------------------------------------------------------------------------------------------|--------|---------|
| 7* | What is the <u>main</u> source of <u>drinking water</u> for the members of this HH that they have used in the last thirty days? <b>Only one answer</b><br><b>CODE BOX #2</b> | [ ][ ] | [WATER] |
|----|------------------------------------------------------------------------------------------------------------------------------------------------------------------------------|--------|---------|

| <b>CODE BOX #2</b>    |                         |            |  |
|-----------------------|-------------------------|------------|--|
| 01=Standpipe          | 04=Unprotected dug well | 08=Bottled |  |
| 02=Hand pump          | 05=Rain water           |            |  |
| 03=Protected dug well | 06=River/stream         |            |  |

|     |                                                                                                                                                                                                                                |                                    |                        |
|-----|--------------------------------------------------------------------------------------------------------------------------------------------------------------------------------------------------------------------------------|------------------------------------|------------------------|
| 8*  | How long does it take to collect water from water point (one way)? <b>MINUTES</b>                                                                                                                                              | [ ] <b>minutes</b>                 | [TIMWAT]               |
| 9*  | How do you treat water before drinking it?<br><b>00=Don't treat 01=Boil 02=Chlorine(Phitki) 03= Fabric 04=leave to sediment</b>                                                                                                | [ ]                                | [TREWAT]               |
| 10* | Do you store water?<br><b>01=Yes 00=No If no skip&gt;&gt;14</b>                                                                                                                                                                | [ ][ ]                             | [STORWAT]              |
| 11* | How many days do you store water before it is consumed? In <b>days</b>                                                                                                                                                         | [ ][ ]                             | [STORTIM]              |
| 12* | May I see the containers please?<br><b>If no skip&gt;&gt;14</b>                                                                                                                                                                |                                    |                        |
| 13* | <b>OBSERVE THE WATER STORAGE CONTAINERS/ CHECK AND SEE IF THEY ARE NARROW NECKED OR COVERED</b><br><b>01=All containers narrow necked or covered 02=Some are narrow necked or covered 03=None are narrow necked or covered</b> | [ ][ ]                             | [CONTWAT]              |
| 14* | What is the MAIN kind of toilet facility used by this household? <b>Only one answer</b><br><b>CODE BOX #3</b><br><b>THIS VARIABLE IS USED TO CREATE WEALTH INDEX</b>                                                           | Male(s) [ ][ ]<br>Female(s) [ ][ ] | [MTOILET]<br>[FTOILET] |

| <b>CODE BOX #3</b>          |                         |  |  |
|-----------------------------|-------------------------|--|--|
| 01=Flush toilet/septic tank | 03=Pit latrine (public) |  |  |
| 02=Pit latrine (household)  | 04=Bush/ditch           |  |  |

|    |                                                                                                                                                                                   |        |                             |
|----|-----------------------------------------------------------------------------------------------------------------------------------------------------------------------------------|--------|-----------------------------|
| 15 | Do you have soap in this household?<br>(Ask to see the soap)<br><br><b>00=No 01=Yes, soap 02=Yes, sand 03=Yes, soap or sand</b>                                                   | [ ][ ] | [SOAP]                      |
| 16 | Have you used soap today or yesterday?<br><br><b>00=No 01=Yes</b>                                                                                                                 | [ ][ ] | [SOAPY]                     |
| 17 | <b>OBSERVATION ONLY:</b> Is there a handwashing device e.g. tap, basin, bucket, sink etc in the compound?<br><b>00=No 01=Yes</b>                                                  | [ ][ ] | [HYGIEN_SC]<br>[HYGIEN_CAT] |
| 18 | <b>OBSERVATION ONLY:</b> Is the inside of the house swept and clean?<br><b>00=Not swept 01=Well swept 02=Partially swept</b>                                                      | [ ][ ] |                             |
| 19 | <b>OBSERVATION ONLY:</b> Are there any animal or human faeces around the front of the house (within 3 meters of the front door or within the HH compound)?<br><b>00=No 01=Yes</b> | [ ][ ] |                             |

### SECTION 3: WEALTH & EMPLOYMENT

|    |                                                                                                                                                                                                |        |        |
|----|------------------------------------------------------------------------------------------------------------------------------------------------------------------------------------------------|--------|--------|
| 20 | On the whole, are you with the life that you lead?<br><br><b>00 = Not at all satisfied ; 01 = slightly satisfied; 03 = moderately satisfied; 04 = Very satisfied; 05 = Extremely satisfied</b> | [ ][ ] | [PPOV] |
|----|------------------------------------------------------------------------------------------------------------------------------------------------------------------------------------------------|--------|--------|

| 21    | Items                    | a. How many of these items do you currently own |           | b. How many assets you sell in the past month?<br>00=none |             | c. How many did you buy in the past month?<br>00=none |            |
|-------|--------------------------|-------------------------------------------------|-----------|-----------------------------------------------------------|-------------|-------------------------------------------------------|------------|
| 21.1  | Livestock                | [ ][ ]                                          | [ASSET1]  | [ ][ ]                                                    | [ASSETSOLD] | [ ][ ]                                                | [ASSETBUY] |
| 21.2  | Milking Animals          | [ ][ ]                                          | [ASSET2]  |                                                           |             |                                                       |            |
| 21.3  | Poultry                  | [ ][ ]                                          | [ASSET3]  |                                                           |             |                                                       |            |
| 21.4  | Land owned (acres)       | [ ][ ]                                          | [ASSET4]  |                                                           |             |                                                       |            |
| 21.5  | Land cultivated (acres)  | [ ][ ]                                          | [ASSET5]  |                                                           |             |                                                       |            |
| 21.6  | Tubewell                 | [ ][ ]                                          | [ASSET6]  |                                                           |             |                                                       |            |
| 21.7  | Buffalo                  | [ ][ ]                                          | [ASSET7]  |                                                           |             |                                                       |            |
| 21.8  | Cow                      | [ ][ ]                                          | [ASSET8]  |                                                           |             |                                                       |            |
| 21.9  | Shoats                   | [ ][ ]                                          | [ASSET9]  |                                                           |             |                                                       |            |
| 21.10 | Donkey                   | [ ][ ]                                          | [ASSET10] |                                                           |             |                                                       |            |
| 21.11 | Camel                    | [ ][ ]                                          | [ASSET11] |                                                           |             |                                                       |            |
| 21.12 | Donky Carts              | [ ][ ]                                          | [ASSET12] |                                                           |             |                                                       |            |
| 21.13 | Plough                   | [ ][ ]                                          | [ASSET13] |                                                           |             |                                                       |            |
| 21.14 | Radio                    | [ ][ ]                                          | [ASSET14] |                                                           |             |                                                       |            |
| 21.15 | Iron (electric)          | [ ][ ]                                          | [ASSET15] |                                                           |             |                                                       |            |
| 21.16 | Fans (electric)          | [ ][ ]                                          | [ASSET16] |                                                           |             |                                                       |            |
| 21.17 | Sewing machine           | [ ][ ]                                          | [ASSET17] |                                                           |             |                                                       |            |
| 21.18 | Video or cassette player | [ ][ ]                                          | [ASSET18] |                                                           |             |                                                       |            |
| 21.19 | Chair table              | [ ][ ]                                          | [ASSET18] |                                                           |             |                                                       |            |
| 21.20 | Watches, clock           | [ ][ ]                                          | [ASSET20] |                                                           |             |                                                       |            |
| 21.21 | TV                       | [ ][ ]                                          | [ASSET21] |                                                           |             |                                                       |            |

|       |                 |        |           |  |  |  |
|-------|-----------------|--------|-----------|--|--|--|
| 21.22 | VCR, VCP, VCD   | [ ][ ] | [ASSET22] |  |  |  |
| 21.23 | Refrigerator    | [ ][ ] | [ASSET23] |  |  |  |
| 21.24 | Air cooler      | [ ][ ] | [ASSET24] |  |  |  |
| 21.25 | AC              | [ ][ ] | [ASSET25] |  |  |  |
| 21.26 | Computer laptop | [ ][ ] | [ASSET26] |  |  |  |
| 21.27 | Bicycle         | [ ][ ] | [ASSET27] |  |  |  |
| 21.28 | Motor cycle     | [ ][ ] | [ASSET28] |  |  |  |
| 21.29 | Car, truck      | [ ][ ] | [ASSET23] |  |  |  |
| 21.30 | Tractor         | [ ][ ] | [ASSET24] |  |  |  |
| 21.31 | Mobile phone    | [ ][ ] | [ASSET25] |  |  |  |
| 21.32 | Cooking stove   | [ ][ ] | [ASSET26] |  |  |  |
| 21.33 | Cooking range   | [ ][ ] | [ASSET27] |  |  |  |
| 21.34 | Stove/burner    | [ ][ ] | [ASSET28] |  |  |  |
| 21.35 | Washing machine | [ ][ ] | [ASSET28] |  |  |  |

|           |                                                                                                                 |        |             |
|-----------|-----------------------------------------------------------------------------------------------------------------|--------|-------------|
| <b>22</b> | How many people are in any kind of wage (including in-kind payments) employment in the household? <i>NUMBER</i> | [ ][ ] | [HHEMPLNUM] |
|-----------|-----------------------------------------------------------------------------------------------------------------|--------|-------------|

|           | A                                                                                                                                                                                   | B                                                                                                                                          | C                                                                                     |
|-----------|-------------------------------------------------------------------------------------------------------------------------------------------------------------------------------------|--------------------------------------------------------------------------------------------------------------------------------------------|---------------------------------------------------------------------------------------|
| <b>23</b> | What is the <b>primary</b> source of income for the family <b>during the past month</b> ?<br><br><i>See CODE BOX #4</i><br><br><i>If answer is 00 &gt;&gt; Q30</i><br><br>[HHINCS1] | What is the <b>secondary</b> source of income for the family <b>during the past month</b> ?<br><br><i>See CODE BOX #4</i><br><br>[HHINCS2] | <b>Average Income</b> received <b>last 30 days</b> (local currency)<br><br>[HHINCOME] |
|           | [ ][ ]                                                                                                                                                                              | [ ]                                                                                                                                        | [ ][ ]                                                                                |

| CODE BOX #4                                |                           |
|--------------------------------------------|---------------------------|
| 00 = No source at all                      | 07=Cash for Work/training |
| 01 = Agriculture (sharecropper or tenants) | 08 = Remittances          |
| 02 = Daily wage labour                     | 09 = Pensions             |
| 03 = Small Business                        | 10 = Loans                |
| 04 = Enterprise                            | 11 = Debt repayments      |
| 05 = Charity                               | 12 = Microfinance         |
| 06 = BISP                                  | 13 = In-kind              |

**Record the *CURRENT* employment status and hours worked of each working family member who is currently in employment.**

| 24                                      | A                                    | B                                                                                                                                                                 | C                                               | D                                         |
|-----------------------------------------|--------------------------------------|-------------------------------------------------------------------------------------------------------------------------------------------------------------------|-------------------------------------------------|-------------------------------------------|
| Family Relation ( <i>Code Box # 1</i> ) | <b>Job</b><br><br><b>CODE BOX #5</b> | <b>Employment status</b><br><i>01=Permanent full time</i><br><i>02= Permanent part time</i><br><i>03 = Temporary full time</i><br><i>04 = Temporary part time</i> | <b>Hours</b> worked per week (paid and un-paid) | <b>Hours</b> per week spent on child care |
| [HHPOS]                                 | [JOB]<br>[JOB_MOTH]<br>[JOB_FATH]    | [EMPLOY]<br>[EMPLOY_MOTH]<br>[EMPLOY_FATH]                                                                                                                        | [HOURSW]<br>[HHWK_MOTH]<br>[HHWK_FATH]          | [HOURSCC]<br>[HHCC_MOTH]<br>[HHCC_FATH]   |

|                             |         |                     |             |             |
|-----------------------------|---------|---------------------|-------------|-------------|
| [ ] [ ]                     | [ ] [ ] | [ ] [ ]             | [ ] [ ] [ ] | [ ] [ ] [ ] |
| [ ] [ ]                     | [ ] [ ] | [ ] [ ]             | [ ] [ ] [ ] | [ ] [ ] [ ] |
| [ ] [ ]                     | [ ] [ ] | [ ] [ ]             | [ ] [ ] [ ] | [ ] [ ] [ ] |
| [ ] [ ]                     | [ ] [ ] | [ ] [ ]             | [ ] [ ] [ ] | [ ] [ ] [ ] |
| [ ] [ ]                     | [ ] [ ] | [ ] [ ]             | [ ] [ ] [ ] | [ ] [ ] [ ] |
| <b>CODE BOX #5</b>          |         |                     |             |             |
| 01 = Working in agriculture |         | 03 = Skilled manual |             |             |
| 02 = Unskilled manual       |         | 04 = Non manual     |             |             |

## SECTION 4: EXPENDITURE

| 25 | How much was spent by the household last month on ..(item)?<br><i>include purchased, home produced and received as gift</i> | Amount in last 1 month<br>(local currency) |            |
|----|-----------------------------------------------------------------------------------------------------------------------------|--------------------------------------------|------------|
| A  | Cereals                                                                                                                     | [ ] [ ] [ ]                                | [HHEXPF1]  |
| B  | Vitamin A Rich Vegetables/Tubers                                                                                            | [ ] [ ] [ ]                                | [HHEXPF2]  |
| C  | Whitetubers/Roots                                                                                                           | [ ] [ ] [ ]                                | [HHEXPF3]  |
| D  | Dark Green Leafy Vegetables                                                                                                 | [ ] [ ] [ ]                                | [HHEXPF4]  |
| E  | Vitamin A Rich Fruits                                                                                                       | [ ] [ ] [ ]                                | [HHEXPF5]  |
| F  | Other Fruits And Vegetables                                                                                                 | [ ] [ ] [ ]                                | [HHEXPF6]  |
| G  | Organ Meat                                                                                                                  | [ ] [ ] [ ]                                | [HHEXPF7]  |
| H  | Flesh Meats                                                                                                                 | [ ] [ ] [ ]                                | [HHEXPF8]  |
| I  | Eggs                                                                                                                        | [ ] [ ] [ ]                                | [HHEXPF9]  |
| J  | Fish                                                                                                                        | [ ] [ ] [ ]                                | [HHEXPF10] |
| K  | Legumes, Nuts And Seeds                                                                                                     | [ ] [ ] [ ]                                | [HHEXPF11] |
| L  | Milk And Milk Products                                                                                                      | [ ] [ ] [ ]                                | [HHEXPF12] |
| m  | Oils And Fats                                                                                                               | [ ] [ ] [ ]                                | [HHEXPF13] |
| n  | Sweets                                                                                                                      | [ ] [ ] [ ]                                | [HHEXPF14] |
| o  | Spices, Condiments                                                                                                          | [ ] [ ] [ ]                                | [HHEXPF15] |
| p  | Beverages                                                                                                                   | [ ] [ ] [ ]                                | [HHEXPF16] |
| q  | Wild Foods                                                                                                                  | [ ] [ ] [ ]                                | [HHEXPF17] |
| r  | Red Palm Oil                                                                                                                | [ ] [ ] [ ]                                | [HHEXPF18] |
|    |                                                                                                                             |                                            |            |
| a  | Tobacco (cigarettes, tobacco)                                                                                               | [ ] [ ] [ ]                                | [HHEXPN1]  |
| b  | Paraffin/kerosene                                                                                                           | [ ] [ ] [ ]                                | [HHEXPN2]  |
| c  | Charcoal, firewood                                                                                                          | [ ] [ ] [ ]                                | [HHEXPN3]  |
| d  | Other utilities (electricity, gas, water/sewerage services)                                                                 | [ ] [ ] [ ]                                | [HHEXPN4]  |
| e  | Toilet soap                                                                                                                 | [ ] [ ] [ ]                                | [HHEXPN5]  |
| f  | Other toiletries (shampoo, toothpaste, hair cream, etc)                                                                     | [ ] [ ] [ ]                                | [HHEXPN6]  |
| g  | Washing powder, laundry soap, detergents                                                                                    | [ ] [ ] [ ]                                | [HHEXPN7]  |
| h  | Other cleaning expenses, equipment (brushes, shoe polish, etc)                                                              | [ ] [ ] [ ]                                | [HHEXPN8]  |
| i  | Matches, candles                                                                                                            | [ ] [ ] [ ]                                | [HHEXPN9]  |
| j  | Batteries, bulbs                                                                                                            | [ ] [ ] [ ]                                | [HHEXPN10] |
| k  | Bus fares, taxis                                                                                                            | [ ] [ ] [ ]                                | [HHEXPN11] |
| l  | Other transport expenses (bicycle, car repair, petrol etc.)                                                                 | [ ] [ ] [ ]                                | [HHEXPN12] |
| m  | Hair-cut and other personal services                                                                                        | [ ] [ ] [ ]                                | [HHEXPN13] |
| n  | Books, notebooks, newspapers, stationary, etc (not for school)                                                              | [ ] [ ] [ ]                                | [HHEXPN14] |
| o  | Communications (phone calls -- fixed and mobile, post office expenses, etc.)                                                | [ ] [ ] [ ]                                | [HHEXPN15] |
|    |                                                                                                                             |                                            |            |
| p  | Medicines/injections                                                                                                        | [ ] [ ] [ ]                                | [HHEXPM]   |
|    |                                                                                                                             |                                            |            |
| q  | Entertainment/visit to hotel                                                                                                | [ ] [ ] [ ]                                | [HHEXPE]   |

Now I want to ask you some questions regarding items you bought in the LAST THREE MONTHS

TO BE ASKED AT BASELINE, 6 MONTHS AND 12 MONTHS ONLY

| 26 | How much was spent by the household last three months on ..(item)?<br><i>include purchased, home produced and received as gift</i> | Amount in last 3 months<br>(local currency) |            |
|----|------------------------------------------------------------------------------------------------------------------------------------|---------------------------------------------|------------|
| A  | Adult's clothing                                                                                                                   | [_____]                                     | [HHEXP3M1] |
| B  | Children's clothing                                                                                                                | [_____]                                     | [HHEXP3M2] |
| C  | Clothing material and services                                                                                                     | [_____]                                     | [HHEXP3M3] |
| D  | Footwear (including repair costs)                                                                                                  | [_____]                                     | [HHEXP3M4] |
| E  | Recreation (toys, cinema, photography, records etc.)                                                                               | [_____]                                     | [HHEXP3M5] |
| F  | Personal articles (umbrella, watch, lighter, belts, etc.)                                                                          | [_____]                                     | [HHEXP3M6] |
| G  | Children under five health expenditure (doctor's fees, tests, hospitalization charges, etc)                                        | [_____]                                     | [HHEXP3M7] |
| H  | Adult and other children health expenditure (doctor's fees, tests, hospitalization charges, etc)                                   | [_____]                                     | [HHEXP3M8] |

Now I want to ask you some questions regarding items you bought in the LAST YEAR

TO BE ASKED AT BASELINE AND 12 MONTHS ONLY

| 27 | How much was spent by the household last 12 months on ..(item)?<br><i>include purchased, home produced and received as gift</i> | Amount in last 12 months<br>(local currency) |             |
|----|---------------------------------------------------------------------------------------------------------------------------------|----------------------------------------------|-------------|
| A  | Textiles (bedsheet, towels, mosquito netting, etc.)                                                                             | [_____]                                      | [HHEXP12M1] |
| B  | Kitchen equipment (cutlery, pots, plates, small equipment)                                                                      | [_____]                                      | [HHEXP12M2] |
| C  | Lanterns, lamps, torches                                                                                                        | [_____]                                      | [HHEXP12M3] |
| D  | Education (tuition/registration fees, uniforms, textbooks, school supplies, transport to school)                                | [_____]                                      | [HHEXP12M4] |

### CHILD EXPENDITURE

Now I am going to ask you how much you spent on [NAME] during the last WEEK OR MONTH (study child/ren)

RECORD SEPARATELY FOR EACH STUDY CHILD IF >1 CHILD

Thinking about the money spent on [NAME's] food

|    |                                                                                                                                 |            |             |
|----|---------------------------------------------------------------------------------------------------------------------------------|------------|-------------|
| 28 | How much money did you spend on [NAME'S] food last WEEK?                                                                        | [_____]    | [CHEXPF]    |
| 29 | Have you spent more money on [NAMEs] food this month compared to last MONTH?<br><br><i>00=No change 01=Increase 02=Decrease</i> | [___][___] | [CHEXPFINC] |
| 30 | What was the MAIN source of this money?<br><br>CODEBOX #6                                                                       | [___][___] | [CHEXPFS]   |

| CODE BOX #6         |                   |
|---------------------|-------------------|
| 01 = Cash transfers | 06 = Remittances  |
| 02 = FFV            | 07 = Employment   |
| 03 = Savings        | 08 = Loans        |
| 04 = Microfinance   | 09 = Employment   |
| 05 = Sale of assets | 10 = Other source |

**Thinking about the money spent on [NAME's] health**

|    |                                                                                                                                      |         |             |
|----|--------------------------------------------------------------------------------------------------------------------------------------|---------|-------------|
| 31 | How much money did you spend on <b>[NAME'S]</b> health last <b>WEEK</b> ?                                                            | [ ] [ ] | [CHEXPMW]   |
| 32 | How much money did you spend on <b>[NAME'S]</b> health last <b>MONTH</b> ?                                                           | [ ] [ ] | [CHEXPMM]   |
| 33 | Have you spent more money on [NAMEs] health this month compared to last <b>MONTH</b> ?<br>00=No change<br>01=Increase<br>02=Decrease | [ ] [ ] | [CHEXPMINC] |
| 34 | What was the MAIN source of this money?<br><b>CODEBOX #6</b>                                                                         | [ ] [ ] | [CHEXPMS]   |

**Thinking about the money spent on other (non-food) items for [NAME]**

|    |                                                                                                                                              |         |             |
|----|----------------------------------------------------------------------------------------------------------------------------------------------|---------|-------------|
| 35 | How much money did you spend on <b>[NAME'S]</b> non-food items last <b>MONTH</b> ?                                                           | [ ] [ ] | [CHEXPNM]   |
| 36 | Have you spent more money on [NAMEs] non-food items this month compared to last <b>MONTH</b> ?<br>00=No change<br>01=Increase<br>02=Decrease | [ ] [ ] | [CHEXPNINC] |
| 37 | What was the MAIN source of this money?<br><b>CODEBOX #6</b>                                                                                 | [ ] [ ] | [CHEXPNS]   |

**SECTION 5: FOOD SECURITY**

|    |                                                                                                                                                                              |         |            |
|----|------------------------------------------------------------------------------------------------------------------------------------------------------------------------------|---------|------------|
| 38 | Did you or anyone in your household eat anything (meal or snack) <b>outside</b> of the home yesterday?<br><br><b>00= No 01=Yes</b>                                           | [ ] [ ] | [HCONOUT]  |
| 39 | During mealtime who in the family gets to eat first?<br><b>01= Father/males; 02=Mother/females; 03=Children;<br/>04=All adults first; 05=Children first; 06=Eat together</b> | [ ] [ ] | [HHFDDIST] |



| 40 | Have you or members of your household consumed [FOOD ITEM] during the past week?<br><br>Ask full list of items first, then ask details | How much of this food did your HH consume during <u>the last week</u> (7 days) including food purchased, produced, grown or received as payment/gift? |              |
|----|----------------------------------------------------------------------------------------------------------------------------------------|-------------------------------------------------------------------------------------------------------------------------------------------------------|--------------|
|    |                                                                                                                                        | How many days in last 7 days                                                                                                                          | [HDDS]       |
| A  | CEREALS                                                                                                                                | [ ][ ]                                                                                                                                                | [HHCEREAL]   |
| B  | VITAMIN A RICH VEGETABLES/TUBERS                                                                                                       | [ ][ ]                                                                                                                                                | [HHVITAVEG]  |
| C  | WHITETUBERS/ROOTS                                                                                                                      | [ ][ ]                                                                                                                                                | [HHTUBER]    |
| D  | DARK GREEN LEAFY VEGETABLES                                                                                                            | [ ][ ]                                                                                                                                                | [HHDARKGN]   |
| E  | VITAMIN A RICH FRUITS                                                                                                                  | [ ][ ]                                                                                                                                                | [HHVITAFRU]  |
| F  | OTHER FRUITS AND VEGETABLES                                                                                                            | [ ][ ]                                                                                                                                                | [HHOTHFV]    |
| G  | ORGAN MEAT                                                                                                                             | [ ][ ]                                                                                                                                                | [HHIRONMEAT] |
| H  | FLESH MEATS                                                                                                                            | [ ][ ]                                                                                                                                                | [HHFLESH]    |
| I  | EGGS                                                                                                                                   | [ ][ ]                                                                                                                                                | [HHEGGS]     |
| J  | FISH                                                                                                                                   | [ ][ ]                                                                                                                                                | [HHFISH]     |
| K  | LEGUMES, NUTS AND SEEDS                                                                                                                | [ ][ ]                                                                                                                                                | [HHLEGUMES]  |
| L  | MILK AND MILK PRODUCTS                                                                                                                 | [ ][ ]                                                                                                                                                | [HHMILK]     |
| M  | OILS AND FATS                                                                                                                          | [ ][ ]                                                                                                                                                | [HHOIL]      |
| N  | SWEETS                                                                                                                                 | [ ][ ]                                                                                                                                                | [HHSWEET]    |
| O  | SPICES, CONDIMENTS                                                                                                                     | [ ][ ]                                                                                                                                                | [HHSPICE]    |
| P  | BEVERAGES                                                                                                                              | [ ][ ]                                                                                                                                                | [HHBEV]      |
| Q  | WILD FOODS                                                                                                                             | [ ][ ]                                                                                                                                                | [HHWILD]     |
| R  | RED PALM OIL                                                                                                                           | [ ][ ]                                                                                                                                                | [HHPALM]     |
| S  | Rice                                                                                                                                   | [ ][ ]                                                                                                                                                | [HHRICE]     |
| T  | Meals eaten out                                                                                                                        | [ ][ ]                                                                                                                                                | [HHOUT]      |
| U  | Other ready-made foods (biscuits/cakes/pasta/baby foods)                                                                               | [ ][ ]                                                                                                                                                | [HHOTH]      |

|    |                                                                                                                                                                                                |        |          |
|----|------------------------------------------------------------------------------------------------------------------------------------------------------------------------------------------------|--------|----------|
| 41 | In the past month: Was there ever no food to eat of any kind in your household because of lack of resources to get food?<br><br><b>00= No; 01=Rarely; 02=Sometimes; 03=Often</b>               | [ ][ ] | [HHFIAS] |
| 42 | In the past month: Did you or any household member go to sleep at night hungry because there was not enough food?<br><br><b>00= No; 01=Rarely; 02=Sometimes; 03=Often</b>                      | [ ][ ] |          |
| 43 | In the past month: Did you or any household member go a whole day and night without eating anything because there was not enough food?<br><br><b>00= No; 01=Rarely; 02=Sometimes; 03=Often</b> | [ ][ ] |          |

## SECTION 6: COPING

TO BE ASKED AT BASELINE, 6 MONTHS AND 12 MONTHS ONLY

|    |                                                                                                                                                                 |        |          |
|----|-----------------------------------------------------------------------------------------------------------------------------------------------------------------|--------|----------|
| 44 | Are there any household members who have left for migration in past six months ( <i>i.e. migration for work</i> ) in the past month?<br><br><b>00=No 01=Yes</b> | [ ][ ] | [HHMIGR] |
|----|-----------------------------------------------------------------------------------------------------------------------------------------------------------------|--------|----------|



|                                |                                                                    |                            |          |
|--------------------------------|--------------------------------------------------------------------|----------------------------|----------|
| 52                             | If yes what was the main reason for this?<br><br><b>CODEBOX #9</b> | [ ][ ]                     | [HLOANR] |
| <b>CODE BOX #9</b>             |                                                                    |                            |          |
| 01 = Repay debts               |                                                                    | 07 = Water for animals     |          |
| 02 = Festivals                 |                                                                    | 08 = Community obligations |          |
| 03 = Funeral                   |                                                                    | 09 = Taxes                 |          |
| 04 = Illness                   |                                                                    | 10 = Transport             |          |
| 05 = Extra food                |                                                                    | 11 = To buy phone credit   |          |
| 06 = Livestock drugs/vet bills |                                                                    | 12 = Other, pilot          |          |

|                                            |                                                                                                                                   |                   |            |
|--------------------------------------------|-----------------------------------------------------------------------------------------------------------------------------------|-------------------|------------|
| 53                                         | Do you have any debts?<br><br><b>00=No 01=Yes</b><br><b>If yes &gt;&gt;54 otherwise SKIP&gt;&gt;56</b>                            | [ ][ ]            | [HDEBT]    |
| 54                                         | Are you able to pay this debt <b>this month</b> ?<br><br><b>00=No 01=Yes</b><br><b>If yes &gt;&gt;55 otherwise SKIP&gt;&gt;56</b> | [ ][ ]            | [HDEBTREP] |
| 55                                         | How will you repay this debt? (Main method)<br><br><b>CODEBOX #10</b>                                                             | [ ][ ]            | [HHOWREP]  |
| <b>CODE BOX #10</b>                        |                                                                                                                                   |                   |            |
| 01 = Income from agriculture               |                                                                                                                                   | 07 = Remittances  |            |
| 02 = Income from daily wage labour         |                                                                                                                                   | 08 = Pensions     |            |
| 03 = Income from small business/enterprise |                                                                                                                                   | 09 = Extra loans  |            |
| 04 = REFANI CTP                            |                                                                                                                                   | 10 = Gift         |            |
| 05 = Other charity                         |                                                                                                                                   | 11 = Microfinance |            |
| 06 = BISP                                  |                                                                                                                                   | 12 =other pilot   |            |

### SECTION 7: SOCIAL CAPITAL

**TO BE ASKED AT BASELINE, 6 MONTHS AND 12 MONTHS ONLY**

|                                                                      |                                                                                                                                                                                  |                                      |                                          |
|----------------------------------------------------------------------|----------------------------------------------------------------------------------------------------------------------------------------------------------------------------------|--------------------------------------|------------------------------------------|
| 56                                                                   | Are you or any member of the household a member of any organization?<br><b>00=No 01=Yes 88 = refused 99=Don't know</b><br><br><b>If yes &gt;&gt; 57 otherwise SKIP&gt;&gt;58</b> | [ ][ ]                               | [WORG]                                   |
| 57                                                                   | If yes, <b>RECORD ALL THAT APPLY</b><br><br><b>CODEBOX #11</b>                                                                                                                   | [ ][ ]<br>[ ][ ]<br>[ ][ ]<br>[ ][ ] | [WORG1]<br>[WORG2]<br>[WORG3]<br>[WORG4] |
| <b>CODE BOX #11</b>                                                  |                                                                                                                                                                                  |                                      |                                          |
| 01 = Woman's cooperative                                             |                                                                                                                                                                                  | 03 = Villager's agricultural society |                                          |
| 02 = School management committees (SMC)/Students' parent association |                                                                                                                                                                                  | 04 = Village development committee   |                                          |
| 58                                                                   | Are you or any member of the household <b>currently</b> a beneficiary of any <b>other</b> programme(s) – <b>do not include WINS/REFANI here</b>                                  | [ ][ ]                               | [WPGM]                                   |

|           |                                                                                                                                                                             |        |            |
|-----------|-----------------------------------------------------------------------------------------------------------------------------------------------------------------------------|--------|------------|
|           | <b>00=No 01=Yes 88 = refused 99=Don't know</b>                                                                                                                              |        |            |
| <b>59</b> | Are you or any member of the household <b>currently</b> a beneficiary of the Benazir Income Support Programme (BISP)?<br><br><b>00=No 01=Yes 88 = refused 99=Don't know</b> | [ ][ ] | [BISPNOW]  |
| <b>60</b> | Have you or any member of the household received a cash transfer or been a beneficiary of BISP in the past year?<br><br><b>00=No 01=Yes 88 = refused 99=Don't know</b>      | [ ][ ] | [BISPEVER] |

END

## REFANI STUDY – MOTHER & CHILD QUESTIONNAIRE

*Some of these questions are of a sensitive nature and must only be asked by a female enumerator*

### SECTION 1: IDENTIFYING INFORMATION

|          |                                                                                                                                                                                              |                                          |         |
|----------|----------------------------------------------------------------------------------------------------------------------------------------------------------------------------------------------|------------------------------------------|---------|
| <b>1</b> | Team number:                                                                                                                                                                                 | [ ][ ]                                   |         |
| <b>2</b> | How many children are there in this HH between the ages 6-48 months? [ ][ ]                                                                                                                  | Check this matches with HH questionnaire |         |
| <b>3</b> | Child order number; 1, 2 or 3<br><br><i>(Record data for youngest child first and code 1, 2, 3 depending on the order they are in age – make sure twins are coded the correct way round)</i> | [ ]                                      | [ORDER] |
| <b>4</b> | Child NAME<br><br><b>!! Check again you have the right child and then refer to child by that name – make sure twins are coded the correct way round)</b>                                     |                                          |         |

|          |                                                                                                                                                                                                |                   |        |
|----------|------------------------------------------------------------------------------------------------------------------------------------------------------------------------------------------------|-------------------|--------|
| <b>5</b> | Does <b>[NAME]</b> have a certificate of birth?<br><br>If yes recode this (dd/mm/yyyy); if no skip >> Q6<br><br>Enter 77 if the day is unknown<br><br><b>DO NOT LEAVE MONTH AND YEAR EMPTY</b> | -----/-----/----- | [CDOB] |
| <b>6</b> | What is <b>[NAME'S]</b> age (in months)                                                                                                                                                        | [ ][ ] Months     | [CAGE] |
| <b>7</b> | What sex is <b>[NAME]</b> ? 01=Male 02=Female                                                                                                                                                  | [ ][ ]            | [CSEX] |

*The following questions marked [\*] are asked at BASELINE ONLY*

### SECTION 2: IYCF & DIETARY DIVERSITY

|           |                                                                                                            |        |          |
|-----------|------------------------------------------------------------------------------------------------------------|--------|----------|
| <b>8*</b> | Was <b>[NAME]</b> ever breast fed?<br><br>01=Yes 00=No 98=Don't know<br><br><b>If no skip &gt;&gt; Q13</b> | [ ][ ] | [CHBFEV] |
|-----------|------------------------------------------------------------------------------------------------------------|--------|----------|

|     |                                                                                                                                                                                                                                                                                                                                                                                                                                                                       |                                                                                                                    |            |
|-----|-----------------------------------------------------------------------------------------------------------------------------------------------------------------------------------------------------------------------------------------------------------------------------------------------------------------------------------------------------------------------------------------------------------------------------------------------------------------------|--------------------------------------------------------------------------------------------------------------------|------------|
| 9*  | <p>How long after birth did you first put <b>[NAME]</b> to the breast?</p> <p><i>If respondent reports she put the infant to the breast immediately after birth, circle '000' For 'Immediately'.</i></p> <p><i>If less than 1 hour, circle '1' for hours AND RECORD '00' hours.</i></p> <p><i>If less than 24 hours, circle '1' and record number of completed hours, from 01 to 23.</i></p> <p><i>Otherwise, circle '2' and record number of completed days.</i></p> | <p>IMMEDIATELY..... 000</p> <p>OR</p> <p>HOURS.....</p> <p>1 [ ][ ]</p> <p>OR</p> <p>DAYS.....</p> <p>2 [ ][ ]</p> | [CHBFPUT]  |
| 10* | <p>At what age did <b>[NAME]</b> stop receiving breast milk? (<i>in months</i>)</p> <p><i>Record 00 if child <u>still</u> receiving breast milk</i></p>                                                                                                                                                                                                                                                                                                               | [ ][ ] Months                                                                                                      | [CHBFSTOP] |
| 11  | <p>Is <b>[NAME]</b> currently being breastfed or receiving breastmilk?</p> <p><b>01=Yes 00=No</b></p> <p><i>If no skip &gt;&gt; Q13</i></p>                                                                                                                                                                                                                                                                                                                           | [ ][ ]                                                                                                             | [CHBFCURR] |
| 12  | <p>Did <b>[NAME]</b> receive breast milk <b>yesterday</b> during the day or at night?</p> <p><b>01=Yes 00=No 98=Don't know</b></p>                                                                                                                                                                                                                                                                                                                                    | [ ][ ]                                                                                                             | [CHBFY]    |
| 13  | <p>Did <b>[NAME]</b> receive any vitamin/mineral drops yesterday during the day or at night?</p> <p><b>01=Yes 00=No 98=Don't know</b></p>                                                                                                                                                                                                                                                                                                                             | [ ][ ]                                                                                                             | [CHDROPS]  |
| 14  | <p>Has <b>[NAME]</b> taken any multi-vitamin supplements in the past month?</p> <p><b>00= No 01=Yes 98=Don't know</b></p> <p><i>Ask to see what they have</i></p>                                                                                                                                                                                                                                                                                                     | [ ][ ]                                                                                                             | [CHVIT]    |
| 15  | <p>Did <b>[NAME]</b> receive any ORS yesterday during the day or at night?</p> <p><b>01=Yes 00=No 98=Don't know</b></p>                                                                                                                                                                                                                                                                                                                                               | [ ][ ]                                                                                                             | [CHORS]    |
| 16  | <p>Did <b>[NAME]</b> eat anything (meal or snack) outside of the home yesterday?</p> <p><b>00= No 01=Yes</b></p>                                                                                                                                                                                                                                                                                                                                                      | [ ][ ]                                                                                                             | [CHCONOUT] |
| 17  | <p>How many meals or snacks (solid, semi-solid, soft, milk feeds) did <b>[NAME]</b> receive yesterday during the day or at night?</p> <p><b>GIVE NUMBER</b></p> <p><b>Do not include breast milk</b></p>                                                                                                                                                                                                                                                              | [ ][ ]                                                                                                             | [CHMFREQ]  |
| 18  | <p>Is <b>[NAME]</b> receiving any supplementary foods such as Plumpynut? (e.g. CSB+,CSB++ etc.)</p> <p><b>00= No 01=Yes</b></p>                                                                                                                                                                                                                                                                                                                                       | [ ][ ]                                                                                                             | [CHSUPP]   |

|    |                                                                              |                                           |        |
|----|------------------------------------------------------------------------------|-------------------------------------------|--------|
| 19 | Is [NAME] receiving any Complementary Food Vouchers?<br><b>00= No 01=Yes</b> | <input type="text"/> <input type="text"/> | [CHFV] |
|----|------------------------------------------------------------------------------|-------------------------------------------|--------|

**[ASK THE FOLLOWING QUESTIONS TO THE MOTHER FIRST AND THEN ASK ABOUT THE CHILD/REN]**

| 20    | Food Group                          | Examples                                                                                                                                                                             | 00=No;<br>01=Yes                          |                             |
|-------|-------------------------------------|--------------------------------------------------------------------------------------------------------------------------------------------------------------------------------------|-------------------------------------------|-----------------------------|
| 20.1  | CEREALS                             | corn/maize, rice, wheat, sorghum, millet or any other grains or foods made from these (e.g. bread, noodles, porridge or other grain products) + <i>local foods</i>                   | <input type="text"/> <input type="text"/> | [WCEREAL]<br>[CHCEREAL]     |
| 20.2  | VITAMIN A RICH<br>VEGETABLES/TUBERS | carrots, squash, or sweet potatoes that are orange inside + <i>other locally available vitamin-A rich vegetables (e.g. pumpkin)</i>                                                  | <input type="text"/> <input type="text"/> | [WVITAVEG]<br>[CHVITAVEG]   |
| 20.3  | WHITETUBERS/ROOTS                   | white potatoes, or other foods made from roots (e.g. <i>bay, turnip</i> )                                                                                                            | <input type="text"/> <input type="text"/> | [WTUBER]<br>[CHTUBER]       |
| 20.4  | DARK GREEN LEAFY<br>VEGETABLES      | dark green/leafy vegetables, including wild ones + <i>locally available vitamin-A rich leaves e.g. amaranth, spinach, fenugreek leaves</i>                                           | <input type="text"/> <input type="text"/> | [WDARKGN]<br>[CHDARKGN]     |
| 20.5  | VITAMIN A RICH<br>FRUITS            | ripe mangoes, ripe papaya, + <i>other locally available vitamin A-rich fruits</i>                                                                                                    | <input type="text"/> <input type="text"/> | [WVITAFRU]<br>[CHVITAFRU]   |
| 20.6  | OTHER FRUITS AND<br>VEGETABLES      | other fruits, bananas, orange, pineapple, including wild fruits; tomato, onion, cabbage, including wild vegetables, okra, cauliflower, brinjal, bottle ground, cluster beans, chilli | <input type="text"/> <input type="text"/> | [WOTHFV]<br>[CHOTHFV]       |
| 20.7  | ORGAN MEAT                          | liver, kidney, heart or other organ meats or blood-based foods                                                                                                                       | <input type="text"/> <input type="text"/> | [WIRONMEAT]<br>[CHIRONMEAT] |
| 20.8  | FLESH MEATS                         | beef, lamb, goat, wild game, chicken, duck, guinea hen/fowl, other birds                                                                                                             | <input type="text"/> <input type="text"/> | [WFLESH]<br>[CHFLESH]       |
| 20.9  | EGGS                                | chicken, duck, guinea hen or any other eggs                                                                                                                                          | <input type="text"/> <input type="text"/> | [WEGGS]<br>[CHEGGS]         |
| 20.10 | FISH                                | fresh or dried fish                                                                                                                                                                  | <input type="text"/> <input type="text"/> | [WFISH]<br>[CHFISH]         |
| 20.11 | LEGUMES, NUTS AND<br>SEEDS          | beans, peas, lentils, ground nuts or other nuts, seeds or foods made from these                                                                                                      | <input type="text"/> <input type="text"/> | [WLEGUMES]<br>[CHLEGUMES]   |
| 20.12 | MILK AND MILK<br>PRODUCTS           | milk, cheese, yogurt or other milk products, powdered milk                                                                                                                           | <input type="text"/> <input type="text"/> | [WMILK]<br>[CHMILK]         |
| 20.13 | OILS AND FATS                       | oil, fats, butter or margarine added to food or used for cooking                                                                                                                     | <input type="text"/> <input type="text"/> | [WOIL]<br>[CHOIL]           |
| 20.14 | SWEETS                              | sugar, honey, sweetened soda or juice, sugary foods such as chocolates, candies, biscuits and cakes                                                                                  | <input type="text"/> <input type="text"/> | [WSWEET]<br>[CHSWEET]       |
| 20.15 | SPICES, CONDIMENTS                  | Spices(black pepper, salt), condiments, OR <i>local examples</i>                                                                                                                     | <input type="text"/> <input type="text"/> | [WSPICE]<br>[CHSPICE]       |

|       |              |                                         |        |                     |
|-------|--------------|-----------------------------------------|--------|---------------------|
| 20.16 | BEVERAGES    | Tea, coffee, soda, juice                | [ ][ ] | [WBEV]<br>[CHBEV]   |
| 20.17 | WILD FOODS   | Insects, grubs, snails                  | [ ][ ] | [WWILD]<br>[CHWILD] |
| 20.18 | RED PALM OIL | Foods containing red palm oil           | [ ][ ] | [WPALM]<br>[CHPALM] |
| 20.19 | OTHER        | Soft or semi-soft food not listed above | [ ][ ] | [WOTH]<br>[CHOTH]   |

### SECTION 3: SOCIAL CAPITAL

#### QUESTIONS TO BE ASKED AT BASELINE, 6 & 12 MONTHS

| 21                                      |                                                                                                                                                                                                                                                                                                                                    |                                 |                              |
|-----------------------------------------|------------------------------------------------------------------------------------------------------------------------------------------------------------------------------------------------------------------------------------------------------------------------------------------------------------------------------------|---------------------------------|------------------------------|
| 21.1. Groups and networks               | <p>1. If you suddenly needed a small amount of money, how many people beyond your immediate household could you turn to?<br/><b>NUMBER</b></p> <p>2. About how many close friends do you have these days?<br/><b><i>These are people you feel at ease with, can talk to about private matters, or call on for help.</i></b></p>    | <p>1.[ ][ ]</p> <p>2.[ ][ ]</p> | <p>[WSCG]</p> <p>[WSCG1]</p> |
| 21.2. Trust and solidarity              | <p>3. If you were caring for a child and needed to go out for a while, would you ask a neighbour for help? <b>00=No 01=Yes 88 = refused</b></p> <p>4. Generally speaking, would you say that most people can be trusted, or that you can't be too careful in dealing with people?<br/><b>00=No trust 01=Trust 88 = refused</b></p> | <p>3.[ ][ ]</p> <p>4.[ ][ ]</p> | <p>[WSCT]</p> <p>[WSCT1]</p> |
| 21.3. Collective action and cooperation | <p>5. Do you help out a local group as a volunteer?<br/><b>00=No 01=Yes 88 = refused</b></p> <p>6. Have you attended a local community event in the past 6 months (e.g. church fete, school concert, craft exhibition , urs, mela, eid festival <b>other examples in pilot</b>)?<br/><b>00=No 01=Yes 88 = refused</b></p>          | <p>5.[ ][ ]</p> <p>6.[ ][ ]</p> | <p>[WSCC]</p> <p>[WSCC1]</p> |
| 21.4. Social cohesion and inclusion     | <p>7. Are there any services where you or members of your household are occasionally denied service or have only limited opportunity to use?<br/><b>00=No 01=Yes 88 = refused</b></p> <p>8. There are often differences in characteristics between people living in the same village/neighbourhood. For example,</p>               | <p>7.[ ][ ]</p> <p>8.[ ][ ]</p> | <p>[WSCS]</p> <p>[WSCS1]</p> |



|                                     |                                                                                                                                                                                                                                                                                                                                                                                                                          |                                 |                              |
|-------------------------------------|--------------------------------------------------------------------------------------------------------------------------------------------------------------------------------------------------------------------------------------------------------------------------------------------------------------------------------------------------------------------------------------------------------------------------|---------------------------------|------------------------------|
|                                     | <p>differences in wealth, income, social status, ethnic or linguistic background/ race/ caste/ tribe. There can also be differences in religious or political beliefs, or there can be differences due to age or sex.</p> <p>To what extent do any such differences characterise your village/neighbourhood? <b>01= very great extent; 02 = great extent; 03= average; 04 = small extent; 05 = very small extent</b></p> |                                 |                              |
| 21.5. Information and communication | <p>9. In the past month, how many times have you made or received a phone call?<br/><b>NUMBER</b></p> <p>10. What are your three main sources of information about what the government is doing (<i>pilot - such as agricultural extension, workfare, family planning, etc.</i>).<br/><br/><b>CODEBOX #1</b></p>                                                                                                         | <p>9.[ ][ ]</p> <p>10[ ][ ]</p> | <p>[WSC1]</p> <p>[WSC11]</p> |
| <b>CODE BOX #1</b>                  |                                                                                                                                                                                                                                                                                                                                                                                                                          |                                 |                              |
| 01 = Relatives                      |                                                                                                                                                                                                                                                                                                                                                                                                                          | 05 = Work                       |                              |
| 02 = Neighbours                     |                                                                                                                                                                                                                                                                                                                                                                                                                          | 06 = Local newspaper            |                              |
| 03 = Friends                        |                                                                                                                                                                                                                                                                                                                                                                                                                          | 07= FM Radio                    |                              |
| 04 = NGO                            |                                                                                                                                                                                                                                                                                                                                                                                                                          |                                 |                              |

## SECTION 4: AUTONOMY

### BASELINE, 6 & 12 MONTHS

|                                            |                                                                                              |                                         |         |
|--------------------------------------------|----------------------------------------------------------------------------------------------|-----------------------------------------|---------|
| <b>22</b>                                  | Who in your family usually makes the decision on the following matters?<br><b>CODEBOX #2</b> |                                         |         |
|                                            | 1. Your own health                                                                           | [ ][ ]                                  | [WDEC1] |
|                                            | 2. Large household purchases                                                                 | [ ][ ]                                  | [WDEC2] |
|                                            | 3. Daily household purchases                                                                 | [ ][ ]                                  | [WDEC3] |
|                                            | 4. Visits to family, friends, or relatives                                                   | [ ][ ]                                  | [WDEC4] |
|                                            | 5. Food to be cooked each day                                                                | [ ][ ]                                  | [WDEC5] |
|                                            | 6. Number of children and when                                                               | [ ][ ]                                  | [WDEC6] |
|                                            | 7. Joining organisations                                                                     | [ ][ ]                                  | [WDEC7] |
|                                            | 8. Children's marriage                                                                       | [ ][ ]                                  |         |
| <b>CODE BOX #2</b>                         |                                                                                              |                                         |         |
| 01 = themselves (respondent)               |                                                                                              | 04= someone else                        |         |
| 02= husband/partner                        |                                                                                              | 05= respondent and someone else jointly |         |
| 03= respondent and husband/partner jointly |                                                                                              | 088=refused                             |         |

### EXTRA QUESTIONS ASKED AT M12

|    |                                                                                          |        |                                 |
|----|------------------------------------------------------------------------------------------|--------|---------------------------------|
| 23 | Who in your family usually made the decision on the following matters? <b>CODEBOX #2</b> |        |                                 |
|    | 1. How the intervention was utilised                                                     | [ ][ ] | [WDEC9]<br>[WDEC10]<br>[WDEC11] |
|    | 2. Who collected the intervention                                                        | [ ][ ] |                                 |
|    | 3. Who went to the market/shops to use it?                                               | [ ][ ] |                                 |

### **SECTION 5: MOTHER'S HEALTH (PHYSICAL AND MENTAL)**

|    |                                                                                                                                                                          |        |           |
|----|--------------------------------------------------------------------------------------------------------------------------------------------------------------------------|--------|-----------|
| 24 | In the past month: Have you been suffering from any illness that has caused you to rest more than usual?<br><br><b>00= No 01= Yes, but not too bad 02=Yes, much more</b> | [ ][ ] | [WHEALTH] |
| 25 | In the past month: Have you taken any deworming tablet?<br><b>00= No 01= Yes</b>                                                                                         | [ ][ ] | [WDEWORM] |

|    |                                                                                                                        |        |       |
|----|------------------------------------------------------------------------------------------------------------------------|--------|-------|
| 26 | <b>HOW YOU HAVE BEEN FEELING IN THE LAST FOUR WEEKS</b>                                                                |        |       |
|    | <b>00= None of the time, 01= A little of the time, 02= Some of the time, 03= Most of the time, 04= All of the time</b> |        |       |
| A  | In the last four weeks, about how often did you feel tired out for no good reason?                                     | [ ][ ] | [K10] |
| B  | In the last four weeks, about how often did you feel nervous?                                                          | [ ][ ] |       |
| C  | In the last four weeks, about how often did you feel so nervous that nothing could calm you down?                      | [ ][ ] |       |
| D  | In the last four weeks, about how often did you feel hopeless?                                                         | [ ][ ] |       |
| E  | In the last four weeks, about how often did you feel restless or fidgety?                                              | [ ][ ] |       |
| F  | In the last four weeks, about how often did you feel so restless you could not sit still?                              | [ ][ ] |       |
| G  | In the last four weeks, about how often did you feel depressed?                                                        | [ ][ ] |       |
| H  | In the last four weeks, about how often did you feel that everything was an effort?                                    | [ ][ ] |       |
| I  | In the last four weeks, about how often did you feel so sad that nothing could cheer you up?                           | [ ][ ] |       |
| J  | In the last four weeks, about how often did you feel worthless?                                                        | [ ][ ] |       |

|   |                                                                                                                                                                                                 |                                   |              |
|---|-------------------------------------------------------------------------------------------------------------------------------------------------------------------------------------------------|-----------------------------------|--------------|
|   | <b>HOW THESE FEELINGS MAY HAVE AFFECTED YOU IN THE LAST FOUR WEEKS.</b>                                                                                                                         |                                   |              |
| K | In the last four weeks, how many days were you TOTALLY UNABLE to work, study or manage your day to day activities because of these feelings?                                                    | [ ][ ]<br>Number of days          | [WFEELINGS1] |
| L | [Aside from those days], in the last 4 weeks, HOW MANY DAYS were you able to work or study or manage your day to day activities, but had to CUT DOWN on what you did because of these feelings? | [ ][ ]<br>Number of days          | [WFEELINGS2] |
| M | In the last 4 weeks, how many times have you seen a doctor or any other health professional about these feelings?                                                                               | [ ][ ]<br>Number of consultations | [WFEELINGS3] |

|                                                                                                                 |                                                                                                     |        |              |
|-----------------------------------------------------------------------------------------------------------------|-----------------------------------------------------------------------------------------------------|--------|--------------|
| N                                                                                                               | In the last 4 weeks, how often have physical health problems been the main cause of these feelings? | [ ][ ] | [WFEELINGS4] |
| 00= None of the time, 01= A little of the time, 02= Some of the time, 03= Most of the time, 04= All of the time |                                                                                                     |        |              |

### SECTION 6: CHILD'S HEALTH

|   |                                                                | 27                                                               | 28                                                                     |
|---|----------------------------------------------------------------|------------------------------------------------------------------|------------------------------------------------------------------------|
|   | Has <b>[NAME]</b> had any of the following in the past 2 weeks | 00=No; 01=Yes<br><br>If no >> next illness<br>If no to all >>Q33 | Has <b>[NAME]</b> been ill for more than 14 days?<br><br>00=No, 01=Yes |
| A | <b>Diarrhea</b><br><i>(More than 3 watery stools a day)</i>    | [ ][ ]<br>[CHDIA3]                                               | [ ][ ]<br>[CHDIA3P]                                                    |
| B | <b>Blood in stools</b>                                         | [ ][ ]<br>[CHDIABLD]                                             | [ ][ ]<br>[CHDIABLDP]                                                  |
| C | <b>High fever</b>                                              | [ ][ ]<br>[CHFEVER]                                              | [ ][ ]<br>[CHFEVP]                                                     |
| D | <b>Cough</b>                                                   | [ ][ ]<br>[CHCOUGH]                                              | [ ][ ]<br>[CHCOUNP]                                                    |
| E | <b>Very fast or difficult breathing</b>                        | [ ][ ]<br>[CHCOUGHDF]                                            | [ ][ ]<br>[CHCOUDFP]                                                   |
| F | <b>Serious loss of appetite</b>                                | [ ][ ]<br>[CHAPPT]                                               | [ ][ ]<br>[CHAPPTP]                                                    |
| G | <b>Vomiting everything</b>                                     | [ ][ ]<br>[CHVOM]                                                | [ ][ ]<br>[CHVOMP]                                                     |
| H | <b>Convulsions</b>                                             | [ ][ ]<br>[CHCONV]                                               | [ ][ ]<br>[CHCONVP]                                                    |
| I | <b>Unconsciousness</b>                                         | [ ][ ]<br>[CHCONSCI]                                             |                                                                        |
| J | <b>Extreme lethargy</b>                                        | [ ][ ]<br>[CHLETHAR]                                             | [ ][ ]<br>[CHLETHARP]                                                  |
| K | <b>Measles</b>                                                 | [ ][ ]<br>[CHMEAS]                                               |                                                                        |
| L | <b>Malaria</b>                                                 | [ ][ ]<br>[CHMALA]                                               |                                                                        |

|    |                                                                                                                           |        |          |
|----|---------------------------------------------------------------------------------------------------------------------------|--------|----------|
| 29 | Did you seek medical advice for <b>[NAME]</b> during the past 2 weeks for any of the illnesses above?<br><br>01=Yes 00=No | [ ][ ] | [CHSEEK] |
|----|---------------------------------------------------------------------------------------------------------------------------|--------|----------|

|                             |                                                                                                                                                               |                             |            |
|-----------------------------|---------------------------------------------------------------------------------------------------------------------------------------------------------------|-----------------------------|------------|
|                             | <b>if yes &gt; Q30, if no SKIP &gt;&gt;Q33</b>                                                                                                                |                             |            |
| 30                          | Where did you go for treatment FIRST?<br><br><b>CODEBOX #3</b><br><br>If you went to a second place please answer the next question;<br>otherwise skip to Q35 | [ ][ ]                      | [CHTREAT1] |
| 31                          | Where did you go for treatment SECOND?<br><br><b>CODEBOX #3</b>                                                                                               | [ ][ ]                      | [CHTREAT2] |
| <b>CODE BOX #3</b>          |                                                                                                                                                               |                             |            |
| 01=Hospital                 | 06=Pvt. health centre/clinic                                                                                                                                  | 11=Drug peddler             |            |
| 02=Public clinic            | 07=Pvt. Pharmacy                                                                                                                                              | 12=Traditional practitioner |            |
| 03=Integrated Health centre | 08=Pvt. Doctor                                                                                                                                                | 13=Family member or friend  |            |
| 04=Public mobile clinic     | 09=Pvt. mobile clinic                                                                                                                                         |                             |            |
| 05=Pvt. Hospital            | 10=Market/shop                                                                                                                                                |                             |            |

|    |                                                                                                   |        |              |
|----|---------------------------------------------------------------------------------------------------|--------|--------------|
| 32 | Did [NAME] sleep under a mosquito net last night?<br><b>00= No 01=Yes</b>                         | [ ][ ] | [MOSQNET]    |
| 33 | Did [NAME] receive a deworming tablet in the last year?<br><b>00= No 01=Yes</b>                   | [ ][ ] | [DEWORM]     |
| 34 | Did you attend ANC before you had [NAME] ?<br><b>00= No 01=Yes</b><br><br>If yes Q36 if no skip>> | [ ][ ] | [CHANC]      |
| 35 | Did you attend ANC before you had [NAME] ?<br><b>00= No 01=Yes</b>                                | [ ][ ] | [CHANCVISIT] |

|    |                                                                                                                    |        |            |
|----|--------------------------------------------------------------------------------------------------------------------|--------|------------|
| 36 | Does [NAME] have any long term health problems?<br><br><b>01=Yes 00=No</b><br><br>Do not include seasonal diseases | [ ][ ] | [CHRONIC]  |
| 37 | Is NAME currently taking any medications for any of these diseases?<br><br><b>01=Yes 00=No</b>                     | [ ][ ] | [CHRONMED] |

## SECTION 7 MOTHER/CARER ANTHROPOMETRY/HEAMOGLOBIN

### BASELINE, MONTHLY, 12

|           |                                                                                                                                     |                      |         |
|-----------|-------------------------------------------------------------------------------------------------------------------------------------|----------------------|---------|
| <b>38</b> | Is the mother pregnant?<br><br><b>00=No 01=Yes 99=Don't know</b><br><br><b><i>If Yes DO NOT take weight - skip &gt;&gt; Q38</i></b> | [ ][ ]<br><br>[ ][ ] | [WPREG] |
|-----------|-------------------------------------------------------------------------------------------------------------------------------------|----------------------|---------|

### BASELINE, MONTHLY, 12

|           |                                                                                |                 |        |
|-----------|--------------------------------------------------------------------------------|-----------------|--------|
| <b>39</b> | Mother's Weight (in Kg)<br><br><b>Do not take weight if mother is pregnant</b> | [ ][ ] . [ ] Kg | [WMWT] |
| <b>40</b> | Child/ren's Weight(s) (in Kg)                                                  | [ ][ ] . [ ] Kg | [CWT]  |

### BASELINE ONLY FOR MOTHER

|           |                                        |                    |        |
|-----------|----------------------------------------|--------------------|--------|
| <b>41</b> | Mother's Height 1 (in cm)              | [ ][ ][ ] . [ ] cm | [WMHT] |
| <b>42</b> | Mother's Height 2 (in cm) <u>check</u> | [ ][ ][ ] . [ ] cm |        |

### BASELINE, MONTHLY, 12

|           |                                                                                                             |                    |       |
|-----------|-------------------------------------------------------------------------------------------------------------|--------------------|-------|
| <b>43</b> | Child Height / length (cm)<br><br><b><i>If child &lt;2yrs or if age unknown &lt;87cm measure length</i></b> | [ ][ ][ ] . [ ] cm | [CHT] |
| <b>44</b> | Child Height / length (cm) <u>check</u>                                                                     | [ ][ ][ ] . [ ] cm |       |

### BASELINE, MONTHLY, 12

|           |                                                                          |                 |          |
|-----------|--------------------------------------------------------------------------|-----------------|----------|
| <b>45</b> | Mother's MUAC (in cm)                                                    | [ ][ ] . [ ] cm | [WMUAC]  |
| <b>46</b> | Child MUAC (in cm)<br><br><b>Refer child to CMAM if MUAC &lt;11.5CM!</b> | [ ][ ] . [ ] cm | [CHMUAC] |

|    |                                                   |           |          |
|----|---------------------------------------------------|-----------|----------|
| 47 | Child Bilateral Oedema<br><br><b>01=Yes 00=No</b> | 1. [ ][ ] | [OEDEMA] |
|----|---------------------------------------------------|-----------|----------|

**BASELINE, 6 & 12 MONTHS**

|    |                                                                                                                                                                                                                       |                       |        |
|----|-----------------------------------------------------------------------------------------------------------------------------------------------------------------------------------------------------------------------|-----------------------|--------|
| 48 | Mother's Haemoglobin concentration (in g/dl)<br><br><b>REFER MOTHER TO CLINIC IF ;<br/>NON-PREGNANT WOMEN HB&lt;12 G/DL<br/>PREGNANT WOMEN HB&lt;13G/DL 1ST AND 3RD TRIMESTER; &lt;13.5<br/>G/DL IN 2ND TRIMESTER</b> | [ ][ ] . [ ]<br>g/dl\ | [WMHB] |
|----|-----------------------------------------------------------------------------------------------------------------------------------------------------------------------------------------------------------------------|-----------------------|--------|

|    |                                                                                                 |                         |       |
|----|-------------------------------------------------------------------------------------------------|-------------------------|-------|
| 49 | Child Haemoglobin concentration (in g/dl)<br><br><b>Refer child to clinic ifHb&lt;11.0 g/dl</b> | 1. [ ][ ] . [ ]<br>g/dl | [CHB] |
|----|-------------------------------------------------------------------------------------------------|-------------------------|-------|

**REFANI STUDY – PROCESS EVALUATION QUESTIONNAIRE**  
(COMPLETE ONE QUESTIONNAIRE PER **MOTHER** OF **[NAME(S)]** IN HH)

|                                                                                              |        |                  |        |
|----------------------------------------------------------------------------------------------|--------|------------------|--------|
| Date :<br>____/____/____ DD/MM/YYYY                                                          | [DATE] | Team number: [ ] | [TNUM] |
| HH ID<br><b>THIS IS PRELOADED – PLEASE CHECK IT IS THE CORRECT NUMBER FOR EACH HOUSEHOLD</b> |        |                  |        |

THE FOLLOWING QUESTIONS ARE ONLY FOR THE **INTERVENTION ARMS ONLY** – THEY MUST NOT BE ASKED TO THE COMPARISON GROUP

**1: DELIVERY TO INDIVIDUALS**

|          |                                                                                                                                                                                            |        |                   |
|----------|--------------------------------------------------------------------------------------------------------------------------------------------------------------------------------------------|--------|-------------------|
| <b>1</b> | Ask the mother <b><u>JUST TO CHECK</u></b> what she got.<br><b>DO NOT GIVE HER THE OPTIONS. RECORD HER ANSWER</b><br><br><b>02=DC, 03=FFV, 04=SC</b>                                       | [ ][ ] | [PE_WHAT]         |
| <b>2</b> | <b>Who received (PHYSICALLY COLLECTED) the [CASH] [VOUCHER]</b><br><br><b>01 = mother 02=her husband 03=other male HH member 04=other female HH member</b><br><br><b>If 01 skip to Q 4</b> | [ ][ ] | [PE_WHOREC]       |
| <b>3</b> | <b>If it was not the mother who collected the transfer was the transfer handed over to the mother?</b><br><br><b>00=No 01=Yes all 02 Yes some</b>                                          | [ ][ ] | [PE_HANDOVER<br>] |

**These 2 questions to be asked to ALL arms**

|          |                                                                                                                                              |                                      |             |
|----------|----------------------------------------------------------------------------------------------------------------------------------------------|--------------------------------------|-------------|
| <b>4</b> | <b>What messages did you receive? RECORD ALL THAT APPLY</b><br><br><b>01=Nutrition, 02=WASH, 03= IYCF, 04=Health</b>                         | [ ][ ]<br>[ ][ ]<br>[ ][ ]<br>[ ][ ] | [PE_KEYMSG] |
| <b>5</b> | <b>Did anybody else also receive the key messages?</b><br><br><b>00 =no 01=her husband 02=other male HH member 03=other female HH member</b> | [ ][ ]                               | [PE_KEY]    |

## SECTION 2:

### CASH AND VOUCHER

|           |                                                                                                                                                                                                                  |             |               |
|-----------|------------------------------------------------------------------------------------------------------------------------------------------------------------------------------------------------------------------|-------------|---------------|
| <b>6</b>  | How do you travel TO the distribution point?<br><br><b>01=bicycle 02=donkey cart 03 = local transport 04= motorbike 05= on foot</b>                                                                              | [ ][ ]      | [PE_TRAVMODE] |
| <b>7</b>  | How long does it take to get there? This is one way and doesn't include waiting time <b>MINUTES</b>                                                                                                              | [ ] minutes | [PE_TIMETO]   |
| <b>8</b>  | How long did you have to wait to collect your transfer? <b>MINUTES</b><br><br><b>(Waiting time includes the entire time from when they are told to arrive (or when they actually arrive) to when they leave)</b> | [ ] minutes | [PE_TIMEWAIT] |
| <b>9</b>  | How do you travel HOME from the distribution site? See Q6 categories                                                                                                                                             | [ ]         |               |
| <b>10</b> | How long does it take to get home? <b>MINUTES</b><br>(This is one way and doesn't include waiting time)                                                                                                          | [ ][ ]      | [PE_TIMEFROM] |
| <b>11</b> | Approximately how much money do you (or another member of your household) spend on transport to collect your cash or voucher transfer? <b>Rupees</b>                                                             | [ ] Rupees  | [PE_COSTCOLL] |
| <b>12</b> | Are there any informal fees paid to get the transfer (e.g. % HHs paying any "informal fees" to anybody (person to collect cash/FV, bank staff, ACF staff, food vendors (FFV)))<br><br><b>00=No 01=Yes</b>        | [ ][ ]      | [PE_INF_FEE]  |
| <b>13</b> | How satisfied were you with the transfer?<br><br><b>Satisfaction (1 to 10; 1 = very poor, 10 = very good)</b>                                                                                                    | [ ][ ]      | [PE_SATIS]    |
| <b>14</b> | <b>BNF security going home</b><br><br><b>00=Do not feel safe 01=Feel fairly safe 02=Feel very safe</b>                                                                                                           | [ ]/[ ]     | [PE_SECURE]   |

## SECTION 3:

### CASH ONLY

|                    |                                                                                                                                                                     |        |                |
|--------------------|---------------------------------------------------------------------------------------------------------------------------------------------------------------------|--------|----------------|
| <b>15</b>          | What was the main use of the cash? Record the main use <b>CODE BOX #1</b><br><br><b>Prompt if necessary</b><br><br><b>If this was the only use then skip to Q20</b> | [ ][ ] | [PE_1CASH_USE] |
| <b>16</b>          | What was the second main use of the CASH? Record the main use using <b>CODE BOX #1</b><br><br><b>If all the cash was used on Q6 skip to Q8</b>                      | [ ][ ] | [PE_2CASH_USE] |
| <b>CODE BOX #1</b> |                                                                                                                                                                     |        |                |



|                             |                                                             |                                                               |                                 |
|-----------------------------|-------------------------------------------------------------|---------------------------------------------------------------|---------------------------------|
| 00 = Not spent yet          | 05= on food for all the family                              | 10= on non-food items for the index children (excl schooling) | 15=loaned to family member      |
| 01=Saved all                | 06= on food for all the children                            | 11= on medical items for all the family                       | 16= loaned to non-family member |
| 02=Saved most               | 07=on food for index children only                          | 12= on medical items for all the children                     |                                 |
| 03=Paid off debts           | 08=on non-food items for all the family (excl schooling)    | 13= on medical items for the index children                   |                                 |
| 04=Bought productive assets | 09= on non-food items for all the children (excl schooling) | 14=schooling                                                  |                                 |

|           |                                                                                     |        |                 |
|-----------|-------------------------------------------------------------------------------------|--------|-----------------|
| <b>17</b> | Was the cash transfer amount sufficient to cover needs<br><br><b>00=No 01 = Yes</b> | [ ][ ] | [PE_SUFFICIENT] |
|-----------|-------------------------------------------------------------------------------------|--------|-----------------|

#### SECTION 4:

#### VOUCHERS ONLY

|           |                                                                                                                                                                              |        |                  |
|-----------|------------------------------------------------------------------------------------------------------------------------------------------------------------------------------|--------|------------------|
| <b>18</b> | Were the vouchers used as intended (i.e. redeemed in the shop for food items)?<br><br><b>00=No 01=Yes</b>                                                                    | [ ][ ] | [PE_FFVUSE]      |
| <b>19</b> | Were any of the vouchers sold?<br><br><b>00=No 01=Yes all (skip to Q33) 02=Yes some</b>                                                                                      | [ ][ ] | [PE_FFVSOLD]     |
| <b>20</b> | Were any of the voucher <i>items</i> sold?<br><br><b>00=No 01=Yes all 02=Yes some</b>                                                                                        | [ ][ ] | [PE_FFVITEMSOLD] |
| <b>21</b> | Who were the main beneficiaries of the VOUCHER?<br><br><b>01=index children only 02= all children 03=all family 04=adults only 05=male adults only 06=female adults only</b> | [ ][ ] | [PE_FFVBNF]      |
| <b>22</b> | Was the voucher redeemed correctly i.e. were the correct amount of items received?<br><br><b>00=No 01=Yes</b>                                                                | [ ][ ] | [PE_FFVCORR]     |
| <b>23</b> | Were the items received of acceptable quality?<br><br><b>00=No 01=Yes</b>                                                                                                    | [ ][ ] | [PE_FFVQUALITY]  |

|    |                                                                                              |        |              |
|----|----------------------------------------------------------------------------------------------|--------|--------------|
| 24 | If given the choice would you have preferred cash to the voucher?<br><br><b>00=No 01=Yes</b> | [ ][ ] | [PE_FFVPREF] |
|----|----------------------------------------------------------------------------------------------|--------|--------------|

**These questions are only for VOUCHER recipients who sold any of their vouchers**

|                             |                                                                                                 |                                                               |                                 |
|-----------------------------|-------------------------------------------------------------------------------------------------|---------------------------------------------------------------|---------------------------------|
| 25                          | If you sold the vouchers what did you do with the cash?<br><br><b>USE CODEBOX #1 Record all</b> | [ ][ ]<br>[ ][ ]<br>[ ][ ]<br>[ ][ ]<br>[ ][ ]                | [PE_FFVSOLDWHAT]                |
| <b>CODE BOX #1</b>          |                                                                                                 |                                                               |                                 |
| 00 = Not spent yet          | 05= on food for all the family                                                                  | 10= on non-food items for the index children (excl schooling) | 15=loaned to family member      |
| 01=Saved all                | 06= on food for all the children                                                                | 11= on medical items for all the family                       | 16= loaned to non-family member |
| 02=Saved most               | 07=on food for index children only                                                              | 12= on medical items for all the children                     |                                 |
| 03=Paid off debts           | 08=on non-food items for all the family (excl schooling)                                        | 13= on medical items for the index children                   |                                 |
| 04=Bought productive assets | 09= on non-food items for all the children (excl schooling)                                     | 14=schooling                                                  |                                 |
